# Supplementary material
Source: PubMed Central journal article supplement (PMC3911833)
Supplement: IAI.01304-13_zii999090454so1.pdf [file IAI.01304-13_zii999090454so1.pdf]

## SUPPLEMENTAL MATERIAL

### **Dormant intracellular *Salmonella* discriminates among SPI-2 effectors to persist inside fibroblasts**

Cristina Núñez-Hernández, Ana Alonso, M. Graciela Pucciarelli,  
Josep Casadesús, and Francisco García-del Portillo

**Table S1.** *S. enterica* serovar Typhimurium strains and plasmids used in this study.

**Table S2.** Plasmids and oligonucleotides used for chromosome epitope tagging.

**TABLE S1.** *S. enterica* serovar Typhimurium strains and plasmids used in this study

| Strain /plasmid | Relevant genotype                                    | Source or reference |
|-----------------|------------------------------------------------------|---------------------|
| SL1344          | <i>hisG64</i> , <i>rpsL</i> , mouse virulent isolate | (1, 2)              |
| SV5015          | SL1344 His <sup>+</sup>                              | (3)                 |
| SV4056          | SL1344 <i>phoP7953::Tn10</i>                         | (4)                 |
| MD1120          | SL1344 His <sup>+</sup> <i>phoP7953::Tn10</i>        | (5)                 |
| SV4235          | SL1344 <i>ompR1009::Tn10</i>                         | (6)                 |
| JPTM30          | SL1344 <i>ssrB::3xFLAG-Kn</i>                        | V.H. Bustamante     |
| 12023s          | wild-type                                            | D. Holden           |
| HH107           | 12023s $\Delta$ <i>sseF::aphT</i>                    | (7)                 |
| HH108           | 12023s $\Delta$ <i>sseG::aphT</i>                    | (7)                 |
| HH109           | 12023s $\Delta$ <i>ssaV::aphT</i>                    | (8)                 |
| HH170           | 12023s $\Delta$ <i>sifA::mTn5</i>                    | (9)                 |
| HH197           | 12023s $\Delta$ <i>sifB::cat</i>                     | (10)                |
| HH210           | 12023s $\Delta$ <i>sseJ::cat</i>                     | (10)                |
| MD1108          | SL1344 $\Delta$ <i>sseF::aphT</i>                    | This work           |
| MD1109          | SL1344 $\Delta$ <i>sseG::aphT</i>                    | This work           |
| MD1111          | SL1344 $\Delta$ <i>ssaV::aphT</i>                    | This work           |
| MD1106          | SL1344 $\Delta$ <i>sifA::mTn5</i>                    | This work           |
| MD1107          | SL1344 $\Delta$ <i>sifB::cat</i>                     | This work           |
| MD1110          | SL1344 $\Delta$ <i>sseJ::cat</i>                     | This work           |
| MD1954          | SL1344 $\Delta$ <i>pipB</i>                          | (11)                |
| MD1955          | SL1344 $\Delta$ <i>pipB2</i>                         | (11)                |
| MD1177          | <i>ssrB::3xFLAG-Kn</i>                               | This work           |
| MD1184          | <i>ssrB::3xFLAG-Kn phoP7953::Tn10</i>                | This work           |
| MD1940          | <i>ssrB::3xFLAG-Kn ompR1009::Tn10</i>                | This work           |
| MD1950          | <i>ssrB::3xFLAG-Kn phoP7953::Tn10 ompR1009::Tn10</i> | This work           |
| MD1149          | <i>pipB::3xFLAG</i>                                  | This work           |
| MD1152          | <i>sseJ::3xFLAG</i>                                  | This work           |
| MD1173          | <i>pipB::3xFLAG-Kn phoP7953::Tn10</i>                | This work           |
| MD1150          | <i>pipB2::HA</i>                                     | This work           |
| MD1174          | <i>pipB2::HA-Kn phoP7953::Tn10</i>                   | This work           |
| p2095           | pWSK9 derivate plasmid, <i>sseF::M45</i>             | (12)                |
| p2096           | pWSK9 derivate plasmid, <i>sseG::M45</i>             | (12)                |
| p2104           | pWSK9 derivate plasmid, <i>sifA::M45</i>             | (12)                |
| p2129           | pWSK9 derivate plasmid, <i>sseJ::M45</i>             | (12)                |
| p2131           | pWSK9 derivate plasmid, <i>sifB::M45</i>             | (12)                |
| MD1113          | SL1344 p2095 (pWSK29 <i>sseF::M45</i> )              | This work           |
| MD1114          | SL1344 p2096 (pWSK29 <i>sseG::M45</i> )              | This work           |
| MD1115          | SL1344 p2104 (pWSK29 <i>sifA::M45</i> )              | This work           |
| MD1116          | SL1344 p2129 (pWSK29 <i>sseJ::M45</i> )              | This work           |
| MD1117          | SL1344 p2131 (pWSK29 <i>sifB::M45</i> )              | This work           |

**TABLE S2.** Plasmids and oligonucleotides used for chromosome epitope tagging.

| Plasmid / primer   | Plasmid function / oligonucleotide sequence (5'-3') <sup>a</sup>                                    | Reference  |
|--------------------|-----------------------------------------------------------------------------------------------------|------------|
| pSUB11             | Template plasmid used to amplify the 3'-end of the gene fused to a 3xFLAG tag and the Kan cassette. | (13)       |
| pSU315             | Template plasmid used to amplify the 3'-end of the gene fused to an HA tag and the Kan cassette.    | (13)       |
| pKD46              | Plasmid expressing the lambda Red recombinase.                                                      | (13)       |
| <i>pipB</i> -flag1 | GATTACAATGATAGAACTCTTTTCCCCCATCCGATATTT <b>GACTA<br/>CAAAGACCATGACGG</b>                            | This study |
| <i>pipB</i> -flag2 | TTTAATAAAACAAGGGGGCCTCTGTTTGAATACTTCTT <b>GTCATA<br/>TGAATATCCTCCTTAG</b>                           | This study |
| <i>pipB2</i> -HA1  | ACAAACACTCTTTAACGAATTTTATAGTGAAAATATTT <b>ATCCGT<br/>ATGATGTTTCCTGAT</b>                            | This study |
| <i>PipB2</i> -HA2  | TATTCAGTAGCAGATTGTTATTCTTACATTGCTTTTATTT <b>CATAT<br/>GAATATCCTCCTTAG</b>                           | This study |

a) Sequences artificially introduced in the primers corresponding to the FLAG- or HA-tag sequences are indicated in bold.

## REFERENCES

1. **Hoiseth SK, Stocker BA.** 1981. Aromatic-dependent *Salmonella typhimurium* are non-virulent and effective as live vaccines. *Nature* **291**:238-239.
2. **Deiwick J, Salcedo SP, Boucrot E, Gilliland SM, Henry T, Petermann N, Waterman SR, Gorvel JP, Holden DW, Meresse S.** 2006. The translocated *Salmonella* effector proteins SseF and SseG interact and are required to establish an intracellular replication niche. *Infect Immun* **74**:6965-6972.
3. **Ortega A, Gonzalo-Asensio J, Garcia-Del Portillo F.** 2012. Dynamics of *Salmonella* small RNA expression in non-growing bacteria located inside eukaryotic cells. *RNA Biol* **9**:469-488.
4. **Garcia-Del Portillo F, Pucciarelli MG, Casadesus J.** 1999. DNA adenine methylase mutants of *Salmonella typhimurium* show defects in protein secretion, cell invasion, and M cell cytotoxicity. *Proc Natl Acad Sci U S A* **96**:11578-11583.
5. **Nunez-Hernandez C, Tierrez A, Ortega AD, Pucciarelli MG, Godoy M, Eisman B, Casadesus J, Garcia-Del Portillo F.** 2013. Genome Expression Analysis of Nonproliferating Intracellular *Salmonella enterica* Serovar Typhimurium Unravels an Acid pH-Dependent PhoP-PhoQ Response Essential for Dormancy. *Infect Immun* **81**:154-165.
6. **Cano DA, Martinez-Moya M, Pucciarelli MG, Groisman EA, Casadesus J, Garcia-Del Portillo F.** 2001. *Salmonella enterica* serovar Typhimurium response involved in attenuation of pathogen intracellular proliferation. *Infect Immun* **69**:6463-6474.
7. **Hensel M, Shea JE, Waterman SR, Mundy R, Nikolaus T, Banks G, Vazquez-Torres A, Gleeson C, Fang FC, Holden DW.** 1998. Genes encoding putative effector proteins of the type III secretion system of *Salmonella* pathogenicity island 2 are required for bacterial virulence and proliferation in macrophages. *Mol Microbiol* **30**:163-174.
8. **Deiwick J, Nikolaus T, Erdogan S, Hensel M.** 1999. Environmental regulation of *Salmonella* pathogenicity island 2 gene expression. *Mol Microbiol* **31**:1759-1773.
9. **Beuzon CR, Meresse S, Unsworth KE, Ruiz-Albert J, Garvis S, Waterman SR, Ryder TA, Boucrot E, Holden DW.** 2000. *Salmonella* maintains the integrity of its intracellular vacuole through the action of SifA. *EMBO J* **19**:3235-3249.
10. **Ruiz-Albert J, Yu XJ, Beuzon CR, Blakey AN, Galyov EE, Holden DW.** 2002. Complementary activities of SseJ and SifA regulate dynamics of the *Salmonella typhimurium* vacuolar membrane. *Mol Microbiol* **44**:645-661.
11. **Knodler LA, Vallance BA, Hensel M, Jackel D, Finlay BB, Steele-Mortimer O.** 2003. *Salmonella* type III effectors PipB and PipB2 are targeted to detergent-resistant microdomains on internal host cell membranes. *Mol Microbiol* **49**:685-704.
12. **Hansen-Wester I, Stecher B, Hensel M.** 2002. Type III secretion of *Salmonella enterica* serovar Typhimurium translocated effectors and SseFG. *Infect Immun* **70**:1403-1409.
13. **Uzzau S, Figueroa-Bossi N, Rubino S, Bossi L.** 2001. Epitope tagging of chromosomal genes in *Salmonella*. *Proc Natl Acad Sci U S A* **98**:15264-15269.
